# Supplementary material for: Accelerated photosynthesis routine in LPJmL4
Source: Copernicus journal article supplement (doi:10.5194/gmd-2022-126), 2022-06-29
Supplement: Supplementary file 2 [file gmd-2022-126-supplement.zip]

```

diff --git a/src/lpj/photosynthesis.c b/src/lpj/photosynthesis.c
index 1cc35247..061f5293 100644
--- a/src/lpj/photosynthesis.c
+++ b/src/lpj/photosynthesis.c
@@ -43,7 +43,7 @@
 *
 */

-Real photosynthesis(Real *agd,      /**< total daytime net photosynthesis (gC/m2/day */
+Real photosynthesis(Real agd[2],    /**< total daytime net photosynthesis (gC/m2/day */
                    Real *rd,        /**< daily leaf respiration (gC/m2/day) */
                    int path,         /**< Path (C3/C4) */
                    Real lambda,
@@ -56,10 +56,11 @@ Real photosynthesis(Real *agd,      /**< total daytime net photosynthesis
(gC/m2
{
    static Real ko,kc,tau,pi,c1,c2;
    Real je,jc,phipi,and,adt,b,s,sigma,vm;
+   Real c1d,c2d,jed,jcd;
    static Real fac,gammastar;
    if(tstress<1e-2)
    {
-   *agd=0;
+   agd[0]=agd[1]=0;
+   *rd=0;
        return 0;
    }
@@ -96,13 +97,15 @@ Real photosynthesis(Real *agd,      /**< total daytime net photosynthesis
(gC/m2
    /*      Recalculation of C1C3, C2C3 with actual pi */

    c1=tstress*param.alphac3*((pi-gammastar)/(pi+2.0*gammastar));
-
+   c1d=tstress*param.alphac3*co2*(1./(pi+2*gammastar)-(pi-
gammastar)/(pi+2*gammastar)/(pi+2*gammastar));
    c2=(pi-gammastar)/(pi+fac);
+   c2d=co2/(pi+fac)-co2*(pi-gammastar)/(pi+fac)/(pi+fac);
    }
    else /* C4 photosynthesis */
    {
        c1=tstress*param.alphac4;
        c2=1.0;
        c2d=0;
+   b=param.bc4;
        s=(24/daylength)*param.bc4;
        sigma=1-(c2-s)/(c2-param.theta*s);
@@ -118,7 +121,12 @@ Real photosynthesis(Real *agd,      /**< total daytime net photosynthesis
(gC/m2
        */
        phipi=lambda/lambdamc4;
        if(phipi<1)
        {
+           c1=tstress*phipi*param.alphac4;
+           c1d=tstress*param.alphac4/lambdamc4;
        }
        else
+           c1d=0;
    }
}

/*
@@ -129,19 +137,26 @@ Real photosynthesis(Real *agd,      /**< total daytime net photosynthesis
(gC/m2
    /*      Eqn 3, Haxeltine & Prentice 1996
    */
    je=c1*apar*cmass*cq/daylength;
+   jed=c1d*apar*cmass*cq/daylength;

    /*
    * Calculation of rubisco-activity-limited photosynthesis rate JC, molC/m2/h
    *      Eqn 5, Haxeltine & Prentice 1996
    */
    jc=c2*hour2day(vm);
+   jcd=c2d*hour2day(vm);

    /*
    *      Calculation of daily gross photosynthesis, Agd, gC/m2/day
    *      Eqn 2, Haxeltine & Prentice 1996
    */

```

```

-   *agd=(je+jc-sqrt((je+jc)*(je+jc)-4.0*param.theta*je*jc))/(2.0*param.theta)*daylength;
+   agd[0]=(je+jc-sqrt((je+jc)*(je+jc)-4.0*param.theta*je*jc))/(2.0*param.theta)*daylength;
+   if(je==0 && jc==0)
+       agd[1]=(jed+jcd)*daylength/2/param.theta;
+   else
+       agd[1]=(jed+jcd-((je+jc)*(jed+jcd)-2.0*param.theta*(jed*jc+je*jcd))/sqrt((je+jc)*(je+jc)-
4.0*param.theta*je*jc))*daylength/2.0/param.theta;
+   agd[1]*=8.314*degCtoK(temp)/p*1000.0/cm2;

    /*      Daily leaf respiration, Rd, gC/m2/day
    *      Eqn 10, Haxeltine & Prentice 1996
@@ -150,7 +165,7 @@ Real photosynthesis(Real *agd,      /**< total daytime net photosynthesis
(gC/m2

    /*      Daily net photosynthesis (at leaf level), And, gC/m2/day */

-   and=*agd-*rd;
+   and=agd[0]-*rd;

    /*      Total daytime net photosynthesis, Adt, gC/m2/day
    *      Eqn 19, Haxeltine & Prentice 1996
diff --git a/src/lpj/water_stressed.c b/src/lpj/water_stressed.c
index 8245b52c..cad02490 100644
--- a/src/lpj/water_stressed.c
+++ b/src/lpj/water_stressed.c
@@ -14,7 +14,7 @@

#include "lpj.h"

#define EPSILON 0.1 /* min precision of solution in bisection method */
#define EPSILON 0.001 /* min precision of solution in bisection method */

typedef struct
{
@@ -24,7 +24,7 @@ typedef struct

static Real fcn(Real lambda,Data *data)
{
-   Real agd,rd;
+   Real agd[2],rd;

    /*
    *      Call photosynthesis to determine alternative total
@@ -33,7 +33,7 @@ static Real fcn(Real lambda,Data *data)
    *      guess for lambda (xmid)
    */

-   return data->fac*(1-lambda)-photosynthesis(&agd,&rd,data->path,lambda,
+   return data->fac*(1-lambda)-photosynthesis(agd,&rd,data->path,lambda,
data->tstress,data->co2,
data->temp,data->apar,
data->daylength);
@@ -47,6 +47,31 @@ static Real fcn(Real lambda,Data *data)

} /* of 'fcn' */

+static void fcn_newton(Real res[2],Real lambda,Data *data)
+{
+   Real agd[2],rd;
+
+   /*
+   *      Call photosynthesis to determine alternative total
+   *      daytime photosynthesis estimate (adt2) implied by
+   *      Eqns 2 & 19, Haxeltine & Prentice 1996, and current
+   *      guess for lambda (xmid)
+   */
+   res[0] = data->fac*(1-lambda)-photosynthesis(agd,&rd,data->path,lambda,
+data->tstress,data->co2,
+data->temp,data->apar,
+data->daylength);
+   res[1] = -data->fac-agd[1];
+
+   /*
+   *      Calculate total daytime photosynthesis implied by
+   *      canopy conductance from water balance routine and
+   *      current guess for lambda (xmid). Units are mm/m2/day
+   *      (mm come from gpd value, mm/day)
+   *      Eqn 18, Haxeltine & Prentice 1996

```

```

+ */
+
+} /* of 'fcn' */
+
Real water_stressed(Pft *pft, /**< pointer to PFT variabls */
                    Real aet_layer[LASTLAYER],
                    Real gp_stand,
@@ -64,16 +89,16 @@ Real water_stressed(Pft *pft, /**< pointer to PFT variabls */
                    Bool permafrost
                    ) /** \return gross primary productivity (gC/m2) */
{
- int l,i;
- Real supply,supply_pft,demand,demand_pft,wr,lambda,gpd,agd,gc,aet,aet_cor;
+ int l,i,iter;
+ Real supply,supply_pft,demand,demand_pft,wr,lambda,gpd,agd[2],gc,aet,aet_cor;
Data data;
Real roots;
Real rootdist_n[LASTLAYER];
Real layer,root_u,root_nu;
Real freeze_depth,thaw_depth;
Bool isless=FALSE;
-
- wr=gpd=agd=*rd=layer=root_u=root_nu=aet_cor=0.0;
+ Bool err;
+ wr=gpd=agd[0]=agd[1]=*rd=layer=root_u=root_nu=aet_cor=0.0;
forrootsoillayer(1)
rootdist_n[1]=pft->par->rootdist[1];
if(permafrost)
@@ -201,14 +226,21 @@ Real water_stressed(Pft *pft, /**< pointer to PFT variabls */
else
data.apar = par*alphaa(pft)*pft->fapar; /** fapar
calculation of trees and grass already include albedo*/
data.daylength=daylength;
- lambda=bisect((Bisectfcn)fcn,0.02,LAMBDA_OPT+0.05,&data,0,EPSILON,10);
- photosynthesis(&agd,rd,data.path,lambda,data.tstress,data.co2,
+ if(fcn(0.02,&data)*fcn(LAMBDA_OPT+0.05,&data)<0)
+ {
+ lambda=newton((Newtonfcn)fcn_newton,0.5,&data,EPSILON,0,20,&iter,&err);
+ pft->stand->cell->output.count++;
+ pft->stand->cell->output.iter+=iter;
+ }
+ else
+ lambda=(0.02+LAMBDA_OPT+0.05)*0.5;
+ photosynthesis(agd,rd,data.path,lambda,data.tstress,data.co2,
temp,data.apar,daylength);
/* in rare occasions, agd(=GPP) can be negative, but shouldn't */
- agd=max(0,agd);
+ agd[0]=max(0,agd[0]);
+ *rd=*rd; /* DON'T DELETE THIS LINE */
}
else
return 0.0;
- return agd;
+ return agd[0];
} /* of 'water_stressed' */

```
